# Supplementary material
Source: publisher figshare collection journal article supplement (https://springernature.figshare.com/ndownloader/files/8832820)
Supplement: Supplementary file [file 8832820]

## Algorithm

The updated populations  $SIR$  for humans and  $SI$  for mosquitos at the time  $t + 1$  is calculated with the following sequencies of steps:

**Step 1:** Input the biological parameters;

**Step 2:** Set the initial conditions for all state variables  $SIRSI$ ;

**Step 3:** Define the time-step  $dt$  to the numerical method;

**Step 4:** Set the initial and final times:  $T_0$  and  $T_f$ ;

**Step 5:** For  $t = T_0$  to  $T_f$ :

- Compute the populations  $SIRSI$  from a discretized form of the ODE system 11 by Euler method, using the  $dt$  defined in **step 5**;
- Update all frequencies  $f(aa)$ ,  $f(Aa)$ ,  $f(AA)$ ,  $p$  and  $q$ ;

**Step 6:** Check the *Hardy-Weinberg* equilibrium, in which  $f(aa) = q^2$ ,  $f(Aa) = 2pq$  and  $f(AA) = p^2$ .

**Step 8:** Check the differences of the dynamics of the three genotypes.
